# Supplementary material for: Circadian regulation of mitochondrial uncoupling and lifespan
Source: PubMed Central journal article supplement (PMC7174288; doi:10.1038/s41467-020-15617-x), 2020-04-21
Supplement: 41467_2020_15617_MOESM1_ESM.pdf [file 41467_2020_15617_MOESM1_ESM.pdf]

## **Description of Supplementary files**

File Name: Source Data

Description: Source data for all graphs presented in this paper.

File Name: Supplementary information

Description: Supplementary Figures, legends, and Supplementary Table

Supplementary Figure 1, related to Figure 1

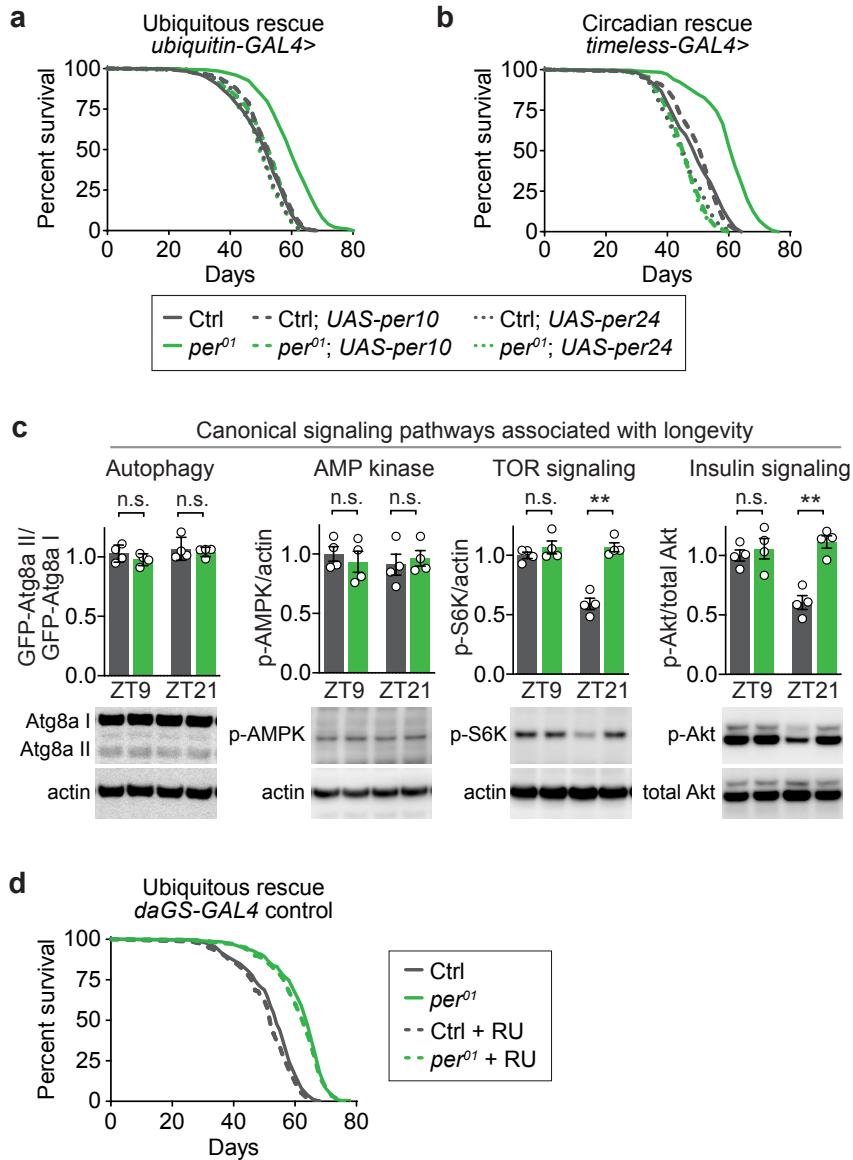

**Supplementary Figure 1. Exogenous rescue of Period in *per<sup>01</sup>* null mutants, Western blot analysis of canonical longevity pathways, and RU486 lifespan controls. (a, b)** Rescue of Per expression in *per<sup>01</sup>* null mutants using either *UAS-per24* or *UAS-per10* transgenes via *ubiquitin-GAL4* (a) or *timeless-GAL4* (b) reverted *per<sup>01</sup>* lifespan back to that of wild-type flies. (c) Western blot analyses of longevity-associated pathways performed at different circadian time points (n=4 samples per condition): phosphorylation of Akt at serine 505, of S6K at threonine 398, of AMPK at threonine 184, and lipidation of GFP-tagged Atg8a. (d) Feeding of RU486 (dashed lines) or vehicle (solid lines) in *per<sup>01</sup>* mutants and controls containing *daGS-GAL4* drivers lacking UAS-transgenes did not influence lifespan. See Supplementary Table 1 for n and statistical analysis of lifespans; n.s. =  $p > 0.05$ , \* =  $p < 0.05$ , \*\* =  $p < 0.01$ , \*\*\* =  $p < 0.001$ , \*\*\*\* =  $p < 0.0001$ ; p-values were obtained by log-rank analysis (a, b, d) and ANOVA followed by Tukey's post-hoc test (c); error bars represent SEM.

Supplementary Figure 2, related to Figure 2

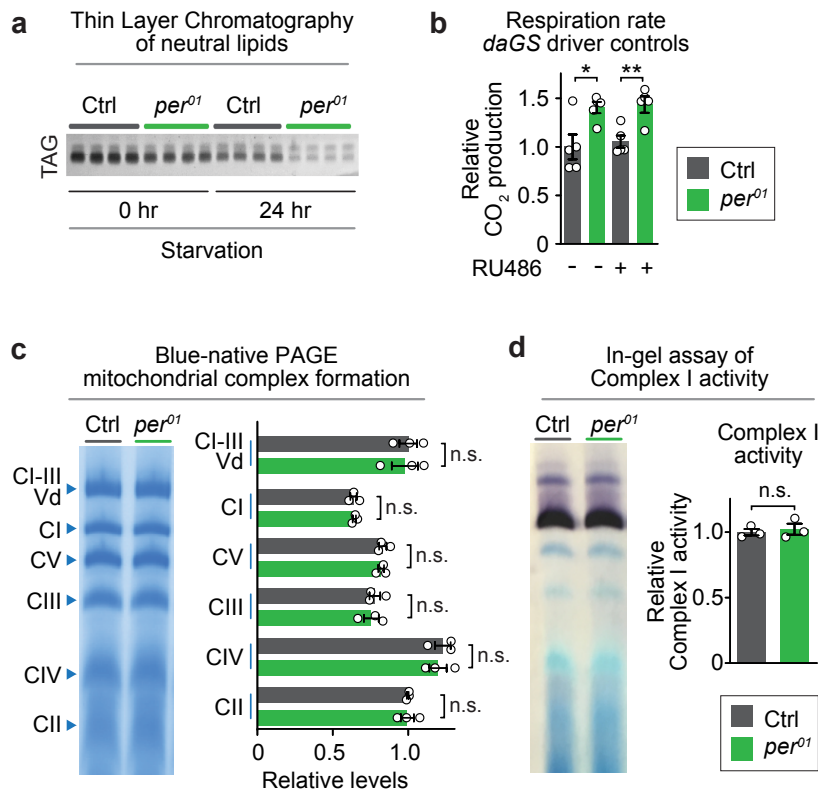

**Supplementary Figure 2. *per* mutants exhibit decreased lipid stores, rapid lipid depletion during starvation, no change in respiration with RU486 treatment, and normal levels of mitochondrial proteins and activity.** (a) Representative images of thin-layer chromatography of TAG for quantification of triacylglyceride (TAG) levels in *per*<sup>01</sup> mutants and controls ( $n \geq 4$  samples/condition, 5 flies/sample) showed that *per*<sup>01</sup> flies exhibited lower levels of lipids compared to control flies at baseline (0 hr) and increased rate of lipid utilization after 24 hours of starvation. (b) Feeding RU486 in flies lacking UAS-transgenes did not alter respiration rates in either mutants or controls ( $n=6$  groups of 10 flies per condition, ANOVA followed by Tukey's post-hoc test). (c) Blue-native PAGE of purified mitochondria from mutants and controls with quantification of complex formation (right) showed that *per*<sup>01</sup> and control lines had no difference in specific electron transport chain complex abundance ( $n=3$  mitochondrial preps,  $p > 0.05$  for all comparisons). (d) In-gel activity assay for complex I from mutants and controls with quantification (right) showed that *per*<sup>01</sup> and control lines had no difference in complex I activity ( $n=3$  mitochondrial preps,  $p > 0.05$  for all comparisons). Statistical significance: n.s. =  $p > 0.05$ , \* =  $p < 0.05$ , \*\* =  $p < 0.01$ , \*\*\* =  $p < 0.001$ , \*\*\*\* =  $p < 0.0001$ ; p-values were obtained by ANOVA followed by Tukey's post-hoc test (a) and two-tailed, unpaired t-test (c, d); error bars represent SEM.

Supplementary Figure 3, related to Figure 3

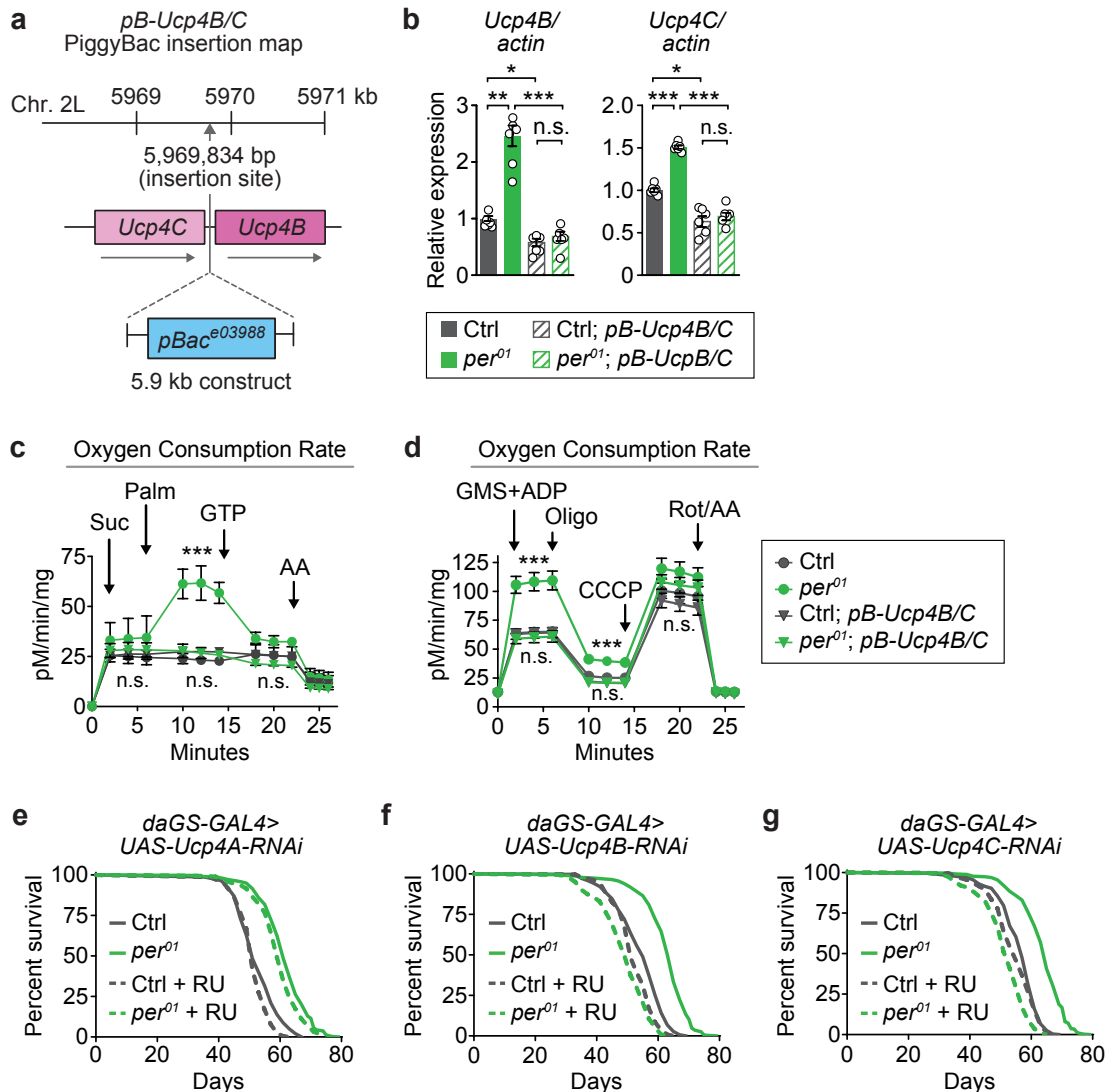

**Supplementary Figure 3. Mitochondrial uncoupling of *per<sup>01</sup>* mutants are dependent on *Ucp4B* or *Ucp4C* expression and UCP4C overexpression causes mitochondrial uncoupling phenotypes** (a) Schematic representation of piggyBAC insertion disrupting intergenic region between *Ucp4B* and *Ucp4C*. (b) Expression levels of *Ucp4B/C* were reduced to near wild-type levels in *per<sup>01</sup>* nulls harboring pBAC mutation (n=6 biological samples pooled from 6 individual circadian timepoints per condition). (c) High-resolution respirometry of mitochondria purified from *per<sup>01</sup>* and control lines with or without piggyBac mutation of *Ucp4B/C* showed that *per<sup>01</sup>* mutant mitochondria exhibited palmitate dependent stimulation of respiration which is reversed by the addition of GTP indicating high uncoupling protein activity. This activity was abolished by disruption of *Ucp4B/C* expression (n=3 mitochondrial preps per condition). (d) Respirometry on mitochondria purified from *per<sup>01</sup>* and control lines with or without piggyBac mutation of *Ucp4B/C* showed that *per<sup>01</sup>* mutant mitochondria exhibited higher respiration rates under steady-state ATP production and oligomycin inhibited leak state respiration, phenotypes abolished by suppression of *Ucp4B/C* activity (n=4-6 mitochondrial preps per condition). (e-g) While induced ubiquitous knockdown of *Ucp4A* (e) did not alter the difference between control and *per<sup>01</sup>* lifespans, induced knockdown of *Ucp4B* (f) and *Ucp4C* (g) significantly reduced *per<sup>01</sup>* lifespan similar to that of controls. See Supplementary Table 1 for lifespan statistical analysis, n.s. = p>0.05, \* = p<0.05, \*\* = p<0.01, \*\*\* = p<0.001, \*\*\*\* = p<0.0001; p-values were obtained by ANOVA followed by Tukey's post-hoc test (b-d), log-rank analysis (e-g); error bars represent SEM.

Supplementary Figure 4, related to Figure 3

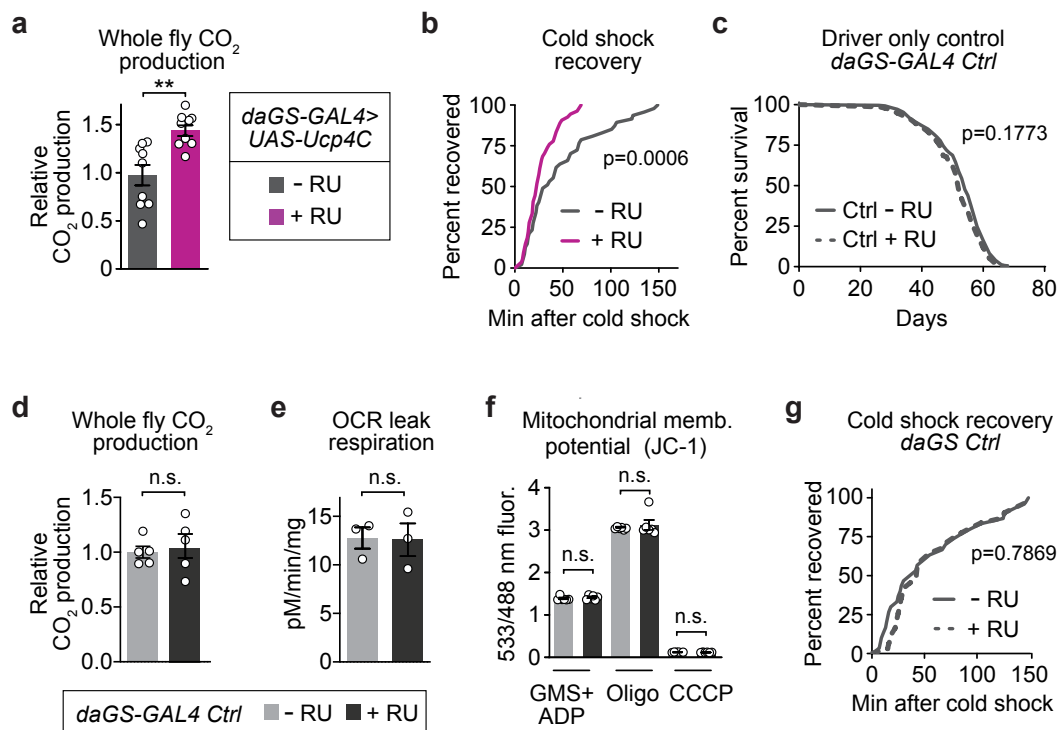

**Supplementary Figure 4. RU486 feeding alone has no influence on lifespan and mitochondrial uncoupling phenotypes.** (a-b) Ubiquitous overexpression of UCP4C resulted in increased respiration (a,  $n \geq 8$  groups of 10 flies per condition,  $p < 0.01$ ) and faster cold shock recovery (b  $n = 47-54$  flies per condition,  $p < 0.001$ ). (c-e) Feeding of RU486 during adulthood to flies containing *daGS-GAL4* drivers but lacking UAS transgenes did not extend lifespan (c) or alter: respiration rates (d,  $n = 5$  groups of 10 flies per condition); leak state oxygen consumption (e,  $n = 3$  oxygraph runs per condition); mitochondrial membrane potential (f,  $n = 6$  mitochondrial preps per condition); or recovery from cold shock in control lines (g,  $n = 24-25$  flies per condition,  $p = 0.723$ ). See Supplementary Table 1 for lifespan statistical analysis, n.s. =  $p > 0.05$ , \* =  $p < 0.05$ , \*\* =  $p < 0.01$ , \*\*\* =  $p < 0.001$ , \*\*\*\* =  $p < 0.0001$ ; p-values were obtained by unpaired two-tailed t-test (a, d-f), and log-rank analysis (b, g); error bars represent SEM.

Supplementary Figure 5, related to Figure 4

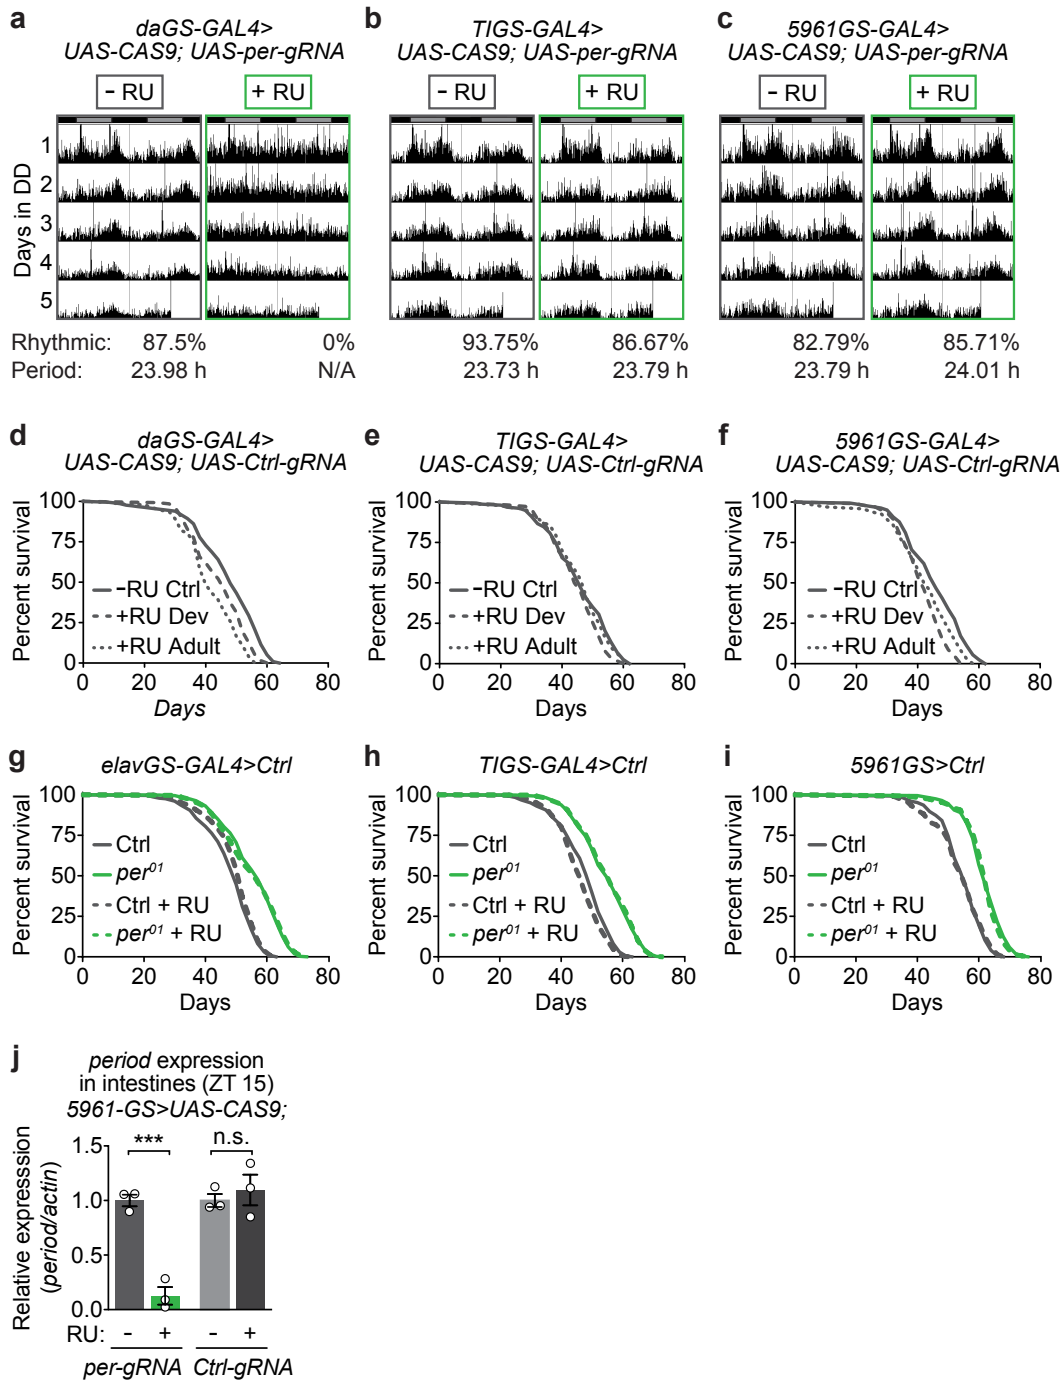

**Supplementary Fig. 5. Lifespan controls for CRISPR-mediated DNA damage; RU486 feeding does not influence lifespan of control or *per*<sup>01</sup> mutants with tissue-specific drivers lacking UAS-transgenes.** (a) Actograms of flies with developmentally induced ubiquitous deletion of *period* show arrhythmicity in constant darkness. (b, c) Flies with intestinal deletion of *period* show no locomotor rhythmicity defects in constant darkness. (d-f) Adulthood-induced CRISPR deletion of a control gene (*acp98AB*) ubiquitously (d), in intestines (e), and in ISC/EB populations (f) did not extend the lifespan of male flies. (g-i) Feeding of RU486 during adulthood to flies lacking UAS-transgenes but containing neuronal *elavGS-GAL4* (g), intestinal *TIGS-GAL4* (h), or ISC/EB-specific *5961GS-GAL4* (i) drivers did not revert *per*<sup>01</sup> lifespans to control levels nor extend control lifespans. (j) Adulthood-induced CRISPR deletion of *period* in ISC/EB populations by feeding of RU486 to flies containing *5961GS-GAL4>UAS-Cas9; per-gRNA* reduced *per* transcript level in the intestine by more than 90% (n=3 samples p<0.001), while adulthood-induced CRISPR deletion of *acp98AB* in ISC/EB populations did not alter *per* transcript levels (n=3 samples 10 intestines/samples, p<0.934). See supplementary Table 1 for lifespan statistical analysis, n.s. = p>0.05, \* = p<0.05, \*\* = p<0.01, \*\*\* = p<0.001, \*\*\*\* = p<0.0001; p-values were obtained by log-rank analysis (d-i) and unpaired two-tailed t-test (j); error bars represent SEM.

Supplementary Figure 6, related to Figure 5

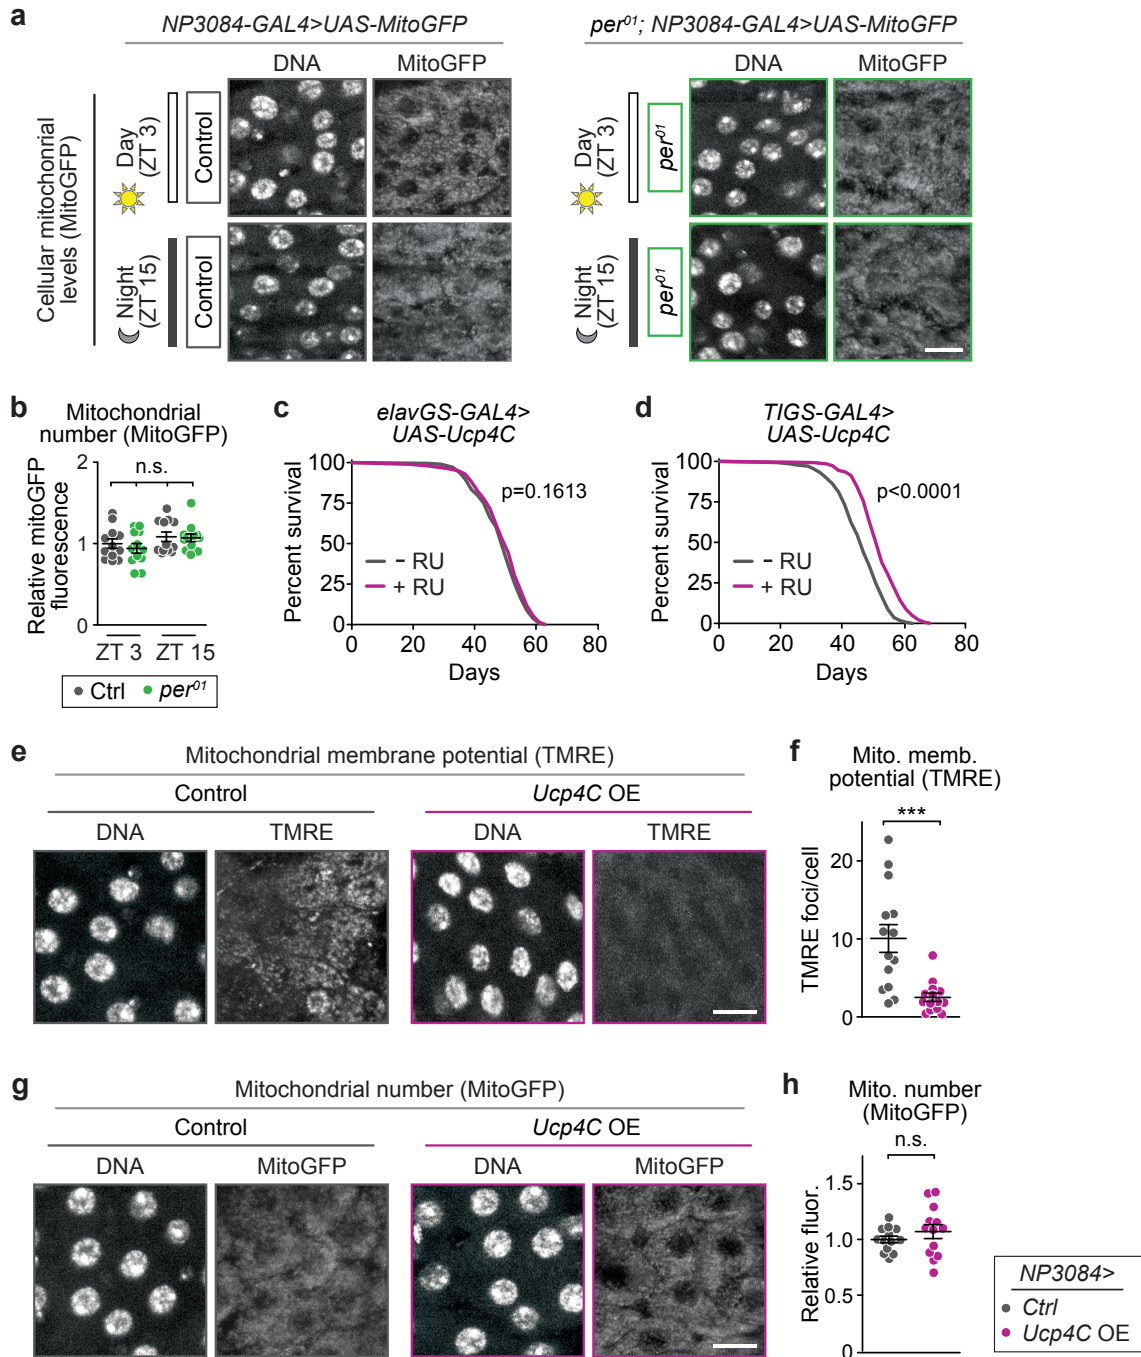

**Supplementary Figure 6. Induced mitochondrial uncoupling influences membrane potential and lifespan.** (a) Representative images of control and *per<sup>01</sup>* posterior midguts expressing mito-GFP (scale bar=10 $\mu$ m). (b) Quantification of mitochondrial fluorescence from controls and *per<sup>01</sup>* mutants during day or night showed no significant changes in mitochondrial abundance (n=12 intestines per condition, ANOVA, p=0.2524). (c, d) While overexpression of UCP4C in neurons (c) caused no lifespan increase (n.s.), overexpression of UCP4C in the intestine (d) extended lifespan (p<0.0001). (e) Representative images of TMRE staining in posterior midguts from *NP3084-GAL4>+* controls and *NP3084-GAL4>UAS-Ucp4C* flies (scale bar=10 $\mu$ m). (f) Quantification of TMRE fluorescence in intestines showed that UCP4C overexpression in the whole intestine (*NP3084-GAL4>UAS-Ucp4C* flies) lowered mitochondrial membrane potential in the posterior midgut relative to controls (*NP3084-GAL4>+*, n=15 intestines per condition, p<0.01). (g) Representative images of control and UCP4C-overexpressing posterior midguts labeled by mito-GFP (scale bar=10  $\mu$ m). (h) Quantification of mitochondrial fluorescence (mito-GFP) showed no difference between control and UCP4C overexpressing flies (n=13 intestines per condition, p=0.313). See Supplementary Table 1 for lifespan statistical analysis, n.s. = p>0.05, \* = p<0.05, \*\* = p<0.01, \*\*\* = p<0.001, \*\*\*\* = p<0.0001; p-values were obtained by ANOVA followed by Tukey's post-hoc test (b), log-rank analysis (c, d), and unpaired two-tailed t-test (f, h); error bars represent SEM.

Supplementary Figure 7, related to Figure 6

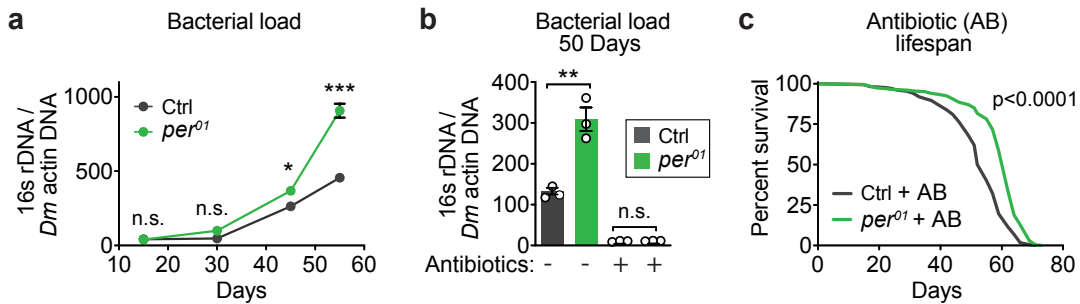

**Supplementary Figure 7. *period* mutants exhibit high microbiome load with age and removal of microbiota via antibiotics does not alter *per*<sup>01</sup> longevity compared to controls.** (a) *per*<sup>01</sup> flies show increased bacterial accumulation with age compared to control animals as marked by universal 16S bacterial PCR (n=4 groups of 20 flies per timepoint). (b) Antibiotic treatment effectively renders flies axenic as marked by 16S PCR (n=3 groups of 20 flies per condition). (c) Antibiotic treatment does not alter *per*<sup>01</sup> lifespan extension (p<0001; log-rank). See Supplementary Table 1 for lifespan statistical analysis, n.s. = p>0.05, \* = p<0.05, \*\* = p<0.01, \*\*\* = p<0.001, \*\*\*\* = p<0.0001; p-values were obtained by two tailed t-test (a) and ANOVA followed by Tukey's post-hoc test (b); error bars represent SEM.

Supplementary Figure 8, related to Figure 7

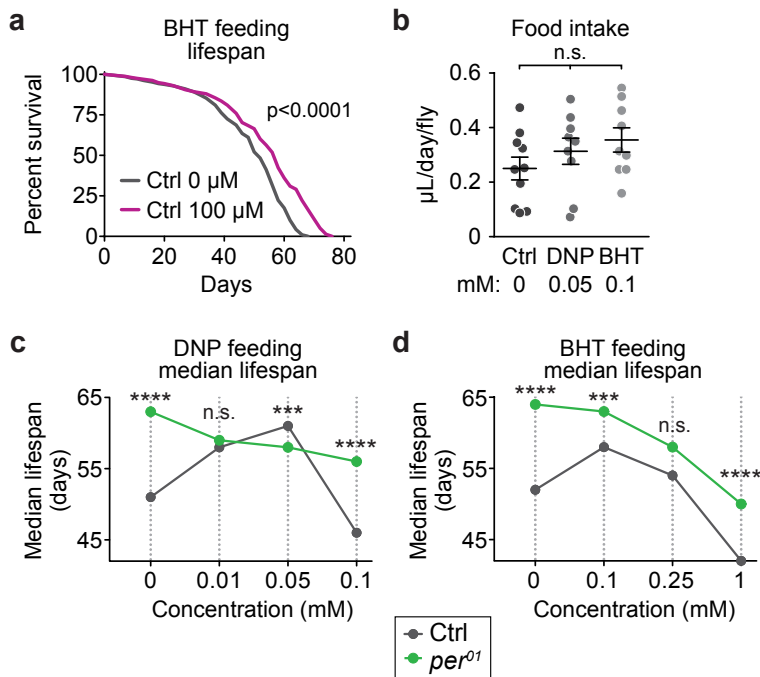

**Supplementary Figure 8. Influence of mitochondrial uncoupling on intestinal phenotypes and lifespan.** (a) Flies fed the uncoupling compound butylated hydroxyl toluene (BHT) during adulthood had increased lifespan compared to vehicle-fed controls. (b) There was no significant difference in feeding rates of flies fed either uncoupling compound 2,4 DNP or BHT relative to ethanol vehicle (n=9-10 groups of 10 flies, p=0.258). (c) While feeding varying concentrations of 2,4 DNP during adulthood to control flies increased their median lifespan in a dose-dependent manner, no median lifespan increase was observed in *per*<sup>01</sup> null mutants. (d) While feeding BHT to control flies increased their lifespan in a dose-dependent manner, no lifespan increase was observed in *per*<sup>01</sup> nulls. See Supplementary Table 1 for lifespan statistical analysis, n.s. = p>0.05, \* = p<0.05, \*\* = p<0.01, \*\*\* = p<0.001, \*\*\*\* = p<0.0001; p-values were obtained by log-rank analysis (a, c, d) and ANOVA followed by Tukey's post-hoc test (b); error bars represent SEM.



Supplementary Figure 9

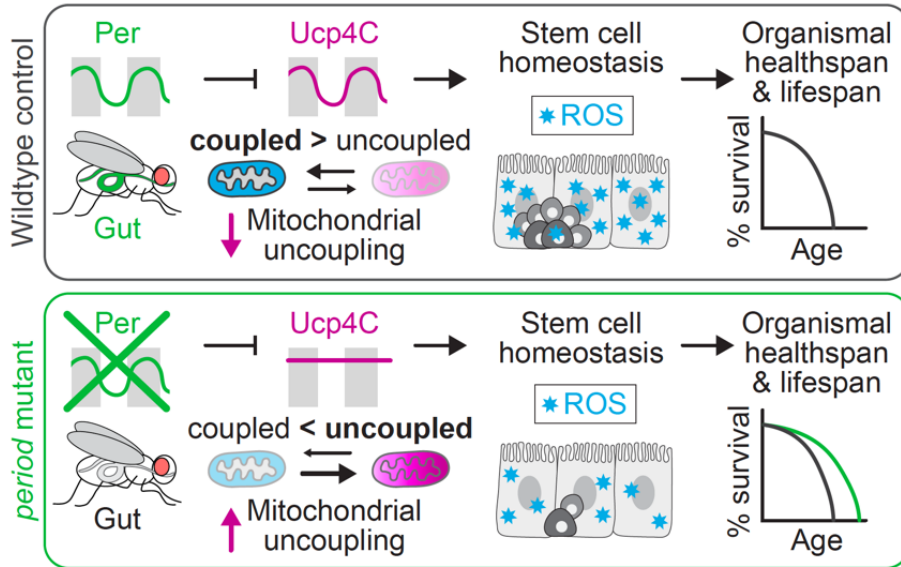

**Supplementary Figure 9. Schematic representation of *Per* and UCP4C influence on longevity and tissue homeostasis.** In wild-type animals (upper panel), *Per* controls the oscillatory expression of UCP4C, leading to oscillation between states of coupled mitochondrial respiration and uncoupled mitochondrial respiration in the intestine over the circadian day. As a result, wild-type animals produce levels of ROS in the gut that promote ISC overproliferation and tissue dysplasia with age and limit lifespan. In contrast, in *per* null mutants (lower panel), loss of *Per* leads to constitutive upregulation of UCP4C expression and constitutively increased levels of uncoupled mitochondrial respiration. ROS production is limited in the intestine of these animals, resulting in better tissue homeostasis and increased longevity.

Supplementary Table 1. Summary of Lifespan experiments presented in figures

| Figure 1 Genotype                              | Figure | rep | Drug/Diet      | n   | Median Lifespan | comparison                                       | % change | log-rank p-value |
|------------------------------------------------|--------|-----|----------------|-----|-----------------|--------------------------------------------------|----------|------------------|
| CS control                                     | 1B     | 1   | -              | 98  | 56              |                                                  |          |                  |
| CS; CS; <i>cyc01</i>                           | 1B     | 1   | -              | 107 | 40              | ctrl vs. <i>cyc01</i>                            | -28.57   | <0.0001          |
| CS control                                     |        | 2   | -              | 205 | 60              |                                                  |          |                  |
| CS; CS; <i>cyc01</i>                           |        | 2   | -              | 111 | 42              | ctrl vs. <i>cyc01</i>                            | -30.00   | <0.0001          |
| <i>daGS&gt;UAS-DN-clk</i>                      | 1C     | 1   | etOH           | 264 | 53              |                                                  |          |                  |
| <i>daGS&gt;UAS-DN-clk</i>                      | 1C     | 1   | 100µg/ml RU486 | 454 | 8               | no RU / +RU                                      | -84.91   | <0.0001          |
| <i>daGS&gt;UAS-DN-clk</i>                      |        | 2   | etOH           | 299 | 50              |                                                  |          |                  |
| <i>daGS&gt;UAS-DN-clk</i>                      |        | 2   | 100µg/ml RU486 | 296 | 13              | no RU / +RU                                      | -74.00   | <0.0001          |
| CS control                                     | 1F     | 1   | 0.01% YE       | 162 | 42              |                                                  |          |                  |
| CS; <i>tim01</i> ; CS                          | 1F     | 1   | 0.01% YE       | 219 | 49              | ctrl / <i>tim01</i>                              | 16.67    | <0.0001          |
| CS control                                     | 1F     | 2   | -              | 348 | 41              |                                                  |          |                  |
| CS; <i>tim01</i> ; CS                          | 1F     | 2   | -              | 263 | 53              | ctrl / <i>tim01</i>                              | 29.27    | <0.0001          |
| CS control                                     | 1F     | 3   | -              | 367 | 42              |                                                  |          |                  |
| CS; <i>tim01</i> ; CS                          | 1F     | 3   | -              | 308 | 52              | ctrl / <i>tim01</i>                              | 23.81    | <0.0001          |
| CS control                                     | 1F     | 1   | 0.5% YE        | 378 | 49              |                                                  |          |                  |
| CS; <i>tim01</i> ; CS                          | 1F     | 1   | 0.5% YE        | 346 | 55              | ctrl / <i>tim01</i>                              | 12.24    | <0.0001          |
| CS control                                     | 1F     | 2   | -              | 278 | 53              |                                                  |          |                  |
| CS; <i>tim01</i> ; CS                          | 1F     | 2   | -              | 223 | 62              | ctrl / <i>tim01</i>                              | 16.98    | <0.0001          |
| CS control                                     | 1F     | 3   | -              | 404 | 52              |                                                  |          |                  |
| CS; <i>tim01</i> ; CS                          | 1F     | 3   | -              | 427 | 60              | ctrl / <i>tim01</i>                              | 15.38    | <0.0001          |
| CS control                                     | 1F     | 1   | 3% YE          | 235 | 44              |                                                  |          |                  |
| CS; <i>tim01</i> ; CS                          | 1F     | 1   | 3% YE          | 358 | 55              | ctrl / <i>tim01</i>                              | 25.00    | <0.0001          |
| CS control                                     | 1F     | 2   | -              | 264 | 48              |                                                  |          |                  |
| CS; <i>tim01</i> ; CS                          | 1F     | 2   | -              | 222 | 55              | ctrl / <i>tim01</i>                              | 14.58    | <0.0001          |
| CS control                                     | 1F     | 3   | -              | 334 | 47              |                                                  |          |                  |
| CS; <i>tim01</i> ; CS                          | 1F     | 3   | -              | 297 | 56              | ctrl / <i>tim01</i>                              | 19.15    | <0.0001          |
| CS control                                     | 1D/F   | 4   | -              | 365 | 46              |                                                  |          |                  |
| CS; <i>tim01</i> ; CS                          | 1D/F   | 4   | -              | 491 | 58              | ctrl / <i>tim01</i>                              | 26.09    | <0.0001          |
| CS control                                     | 1F     | 1   | 10% YE         | 185 | 42              |                                                  |          |                  |
| CS; <i>tim01</i> ; CS                          | 1F     | 1   | 10% YE         | 254 | 39              | ctrl / <i>tim01</i>                              | -7.14    | <0.001           |
| CS control                                     | 1F     | 2   | -              | 208 | 45              |                                                  |          |                  |
| CS; <i>tim01</i> ; CS                          | 1F     | 2   | -              | 306 | 38              | ctrl / <i>tim01</i>                              | -15.56   | <0.0001          |
| CS control                                     | 1F     | 3   | -              | 247 | 42              |                                                  |          |                  |
| CS; <i>tim01</i> ; CS                          | 1F     | 3   | -              | 328 | 37              | ctrl / <i>tim01</i>                              | -11.90   | <0.0001          |
| <i>w1118</i> , CS control                      | 1G     | 1   | 0.01% YE       | 295 | 43              |                                                  |          |                  |
| <i>per01</i> , <i>w1118</i> ; CS; CS           | 1G     | 1   | 0.01% YE       | 221 | 50              | ctrl / <i>per01</i>                              | 16.28    | <0.0001          |
| <i>w1118</i> , CS control                      | 1G     | 2   | -              | 157 | 43              |                                                  |          |                  |
| <i>per01</i> , <i>w1118</i> ; CS; CS           | 1G     | 2   | -              | 70  | 48              | ctrl / <i>per01</i>                              | 11.63    | <0.0001          |
| <i>w1118</i> , CS control                      | 1G     | 3   | -              | 190 | 43              |                                                  |          |                  |
| <i>per01</i> , <i>w1118</i> ; CS; CS           | 1G     | 3   | -              | 201 | 48              | ctrl / <i>per01</i>                              | 11.63    | <0.0001          |
| <i>w1118</i> , CS control                      | 1G     | 1   | 0.5% YE        | 302 | 57              |                                                  |          |                  |
| <i>per01</i> , <i>w1118</i> ; CS; CS           | 1G     | 1   | 0.5% YE        | 245 | 64              | ctrl / <i>per01</i>                              | 12.28    | <0.0001          |
| <i>w1118</i> , CS control                      | 1G     | 2   | -              | 154 | 55              |                                                  |          |                  |
| <i>per01</i> , <i>w1118</i> ; CS; CS           | 1G     | 2   | -              | 124 | 68              | ctrl / <i>per01</i>                              | 23.64    | <0.0001          |
| <i>w1118</i> , CS control                      | 1G     | 3   | -              | 234 | 57              |                                                  |          |                  |
| <i>per01</i> , <i>w1118</i> ; CS; CS           | 1G     | 3   | -              | 267 | 68              | ctrl / <i>per01</i>                              | 19.30    | <0.0001          |
| <i>w1118</i> , CS control                      | 1G     | 1   | 3% YE          | 202 | 48              |                                                  |          |                  |
| <i>per01</i> , <i>w1118</i> ; CS; CS           | 1G     | 1   | 3% YE          | 239 | 61              | ctrl / <i>per01</i>                              | 27.08    | <0.0001          |
| <i>w1118</i> , CS control                      | 1G     | 2   | -              | 137 | 55              |                                                  |          |                  |
| <i>per01</i> , <i>w1118</i> ; CS; CS           | 1G     | 2   | -              | 94  | 62              | ctrl / <i>per01</i>                              | 12.73    | <0.0001          |
| <i>w1118</i> , CS control                      | 1G     | 3   | -              | 204 | 47              |                                                  |          |                  |
| <i>per01</i> , <i>w1118</i> ; CS; CS           | 1G     | 3   | -              | 218 | 59              | ctrl / <i>per01</i>                              | 25.53    | <0.0001          |
| <i>w1118</i> , CS control                      | 1E/G   | 4   | -              | 543 | 50              |                                                  |          |                  |
| <i>per01</i> , <i>w1118</i> ; CS; CS           | 1E/G   | 4   | -              | 551 | 62              | ctrl / <i>per01</i>                              | 24.00    | <0.0001          |
| <i>w1118</i> , CS control                      | 1G     | 1   | 10% YE         | 244 | 43              |                                                  |          |                  |
| <i>per01</i> , <i>w1118</i> ; CS; CS           | 1G     | 1   | 10% YE         | 225 | 38              | ctrl / <i>per01</i>                              | -11.63   | <0.0001          |
| <i>w1118</i> , CS control                      | 1G     | 2   | -              | 132 | 43              |                                                  |          |                  |
| <i>per01</i> , <i>w1118</i> ; CS; CS           | 1G     | 2   | -              | 86  | 41              | ctrl / <i>per01</i>                              | -4.65    | <0.001           |
| <i>w1118</i> , CS control                      | 1G     | 3   | -              | 170 | 43              |                                                  |          |                  |
| <i>per01</i> , <i>w1118</i> ; CS; CS           | 1G     | 3   | -              | 227 | 38              | ctrl / <i>per01</i>                              | -11.63   | <0.0001          |
| Control; <i>daGS&gt;UAS-DN-S6K</i>             |        | 1   | etOH           | 176 | 42              | Ctrl no RU / <i>per01</i> no RU                  | 33.33    | <0.0001          |
| Control; <i>daGS&gt;UAS-DN-S6K</i>             |        | 1   | 100µg/ml RU486 | 187 | 52              | no RU / +RU                                      | 23.81    | <0.0001          |
| <i>per01</i> ; <i>daGS&gt;UAS-DN-S6K</i>       |        | 1   | etOH           | 178 | 56              | Ctrl + RU / <i>per01</i> + RU                    | 26.92    | <0.0001          |
| <i>per01</i> ; <i>daGS&gt;UAS-DN-S6K</i>       |        | 1   | 100µg/ml RU486 | 138 | 66              | <i>per01</i> no RU / <i>per01</i> +RU            | 17.86    | <0.0001          |
| Control; <i>daGS&gt;UAS-DN-S6K</i>             | 1H     | 2   | etOH           | 199 | 43              | Ctrl no RU / <i>per01</i> no RU                  | 27.91    | <0.0001          |
| Control; <i>daGS&gt;UAS-DN-S6K</i>             | 1H     | 2   | 100µg/ml RU486 | 253 | 51              | no RU / +RU                                      | 18.60    | <0.0001          |
| <i>per01</i> ; <i>daGS&gt;UAS-DN-S6K</i>       | 1H     | 2   | etOH           | 170 | 55              | Ctrl + RU / <i>per01</i> + RU                    | 23.53    | <0.0001          |
| <i>per01</i> ; <i>daGS&gt;UAS-DN-S6K</i>       | 1H     | 2   | 100µg/ml RU486 | 338 | 63              | <i>per01</i> no RU / <i>per01</i> +RU            | 14.55    | <0.0001          |
| Control; <i>dilp2-GAL4&gt;</i>                 |        | 1   | -              | 149 | 52              | Ctrl / <i>per01</i>                              | 19.23    | <0.0001          |
| Control; <i>dilp2-GAL4&gt;UAS-reaper</i>       |        | 1   | -              | 145 | 73              | Ctrl / <i>dilp&gt;rpr</i>                        | 40.38    | <0.0001          |
| <i>per01</i> ; <i>dilp2-GAL4&gt;</i>           |        | 1   | -              | 224 | 62              | Ctrl>rpr / <i>per01</i> >rpr                     | 13.70    | <0.0001          |
| <i>per01</i> ; <i>dilp2-GAL4&gt;UAS-reaper</i> |        | 1   | -              | 160 | 83              | <i>per01</i> / <i>per01</i> ; <i>dilp&gt;rpr</i> | 33.87    | <0.0001          |
| Control; <i>dilp2-GAL4&gt;</i>                 | 1I     | 2   | -              | 192 | 50              | Ctrl / <i>per01</i>                              | 24.00    | <0.0001          |
| Control; <i>dilp2-GAL4&gt;UAS-reaper</i>       | 1I     | 2   | -              | 214 | 72              | Ctrl / Ctrl- <i>dilp&gt;rpr</i>                  | 44.00    | <0.0001          |
| <i>per01</i> ; <i>dilp2-GAL4&gt;</i>           | 1I     | 2   | -              | 219 | 62              | Ctrl>rpr / <i>per01</i> >rpr                     | 16.67    | <0.0001          |
| <i>per01</i> ; <i>dilp2-GAL4&gt;UAS-reaper</i> | 1I     | 2   | -              | 281 | 84              | <i>per01</i> / <i>per01</i> ; <i>dilp&gt;rpr</i> | 35.48    | <0.0001          |

| Figure 3                    |        |     | Figure       |     |    | Drug/Diet                          |          |                  | Median Lifespan |  |  | comparison |  |  | % change |  |  | log-rank p-value |  |  |
|-----------------------------|--------|-----|--------------|-----|----|------------------------------------|----------|------------------|-----------------|--|--|------------|--|--|----------|--|--|------------------|--|--|
| Genotype                    | Figure | rep |              | n   |    | comparison                         | % change | log-rank p-value |                 |  |  |            |  |  |          |  |  |                  |  |  |
| Control                     | 3G     | 1   | -            | 233 | 55 | Ctrl / per01                       | 18.18    | <0.0001          |                 |  |  |            |  |  |          |  |  |                  |  |  |
| Control; pBAC-Ucp4B/C       | 3G     | 1   | -            | 432 | 52 | Ctrl / Ctrl-pBAC                   | -5.45    | <0.001           |                 |  |  |            |  |  |          |  |  |                  |  |  |
| per01                       | 3G     | 1   | -            | 270 | 65 | per01-pBAC / Ctrl-pBAC             | 0.00     | ns               |                 |  |  |            |  |  |          |  |  |                  |  |  |
| per01; pBAC-Ucp4B/C         | 3G     | 1   | -            | 457 | 52 | per01 / per01-pBAC                 | -20.00   | <0.0001          |                 |  |  |            |  |  |          |  |  |                  |  |  |
| Control                     |        | 2   | -            | 312 | 53 | Ctrl / per01                       | 20.75    | <0.0001          |                 |  |  |            |  |  |          |  |  |                  |  |  |
| Control; pBAC-Ucp4B/C       |        | 2   | -            | 126 | 53 | Ctrl / Ctrl-pBAC                   | 0.00     | ns               |                 |  |  |            |  |  |          |  |  |                  |  |  |
| per01                       |        | 2   | -            | 250 | 64 | per01-pBAC / Ctrl-pBAC             | 1.89     | ns               |                 |  |  |            |  |  |          |  |  |                  |  |  |
| per01; pBAC-Ucp4B/C         |        | 2   | -            | 112 | 54 | per01 / per01-pBAC                 | -15.63   | <0.0001          |                 |  |  |            |  |  |          |  |  |                  |  |  |
| daGS>UAS-Ucp4C              | 3J     | 1   | etOH         | 512 | 49 |                                    |          |                  |                 |  |  |            |  |  |          |  |  |                  |  |  |
| daGS>UAS-Ucp4C              | 3J     | 1   | 5µg/ml RU486 | 298 | 57 | no RU / +RU                        | 16.33    | <0.0001          |                 |  |  |            |  |  |          |  |  |                  |  |  |
| daGS>UAS-Ucp4C              |        | 2   | etOH         | 281 | 51 |                                    |          |                  |                 |  |  |            |  |  |          |  |  |                  |  |  |
| daGS>UAS-Ucp4C              |        | 2   | 5µg/ml RU486 | 298 | 60 | no RU / +RU                        | 17.65    | <0.0001          |                 |  |  |            |  |  |          |  |  |                  |  |  |
| Control; ubi-GAL4>          | 3K     | 1   | -            | 184 | 50 | Ctrl, ubi / per01, ubi             | 24.00    | <0.0001          |                 |  |  |            |  |  |          |  |  |                  |  |  |
| Control; ubi-GAL4>UAS-Ucp4C | 3K     | 1   | -            | 220 | 60 | Ctrl, ubi / Ctrl, ubi>UCP4c        | 20.00    | <0.0001          |                 |  |  |            |  |  |          |  |  |                  |  |  |
| per01; ubi-GAL4>            | 3K     | 1   | -            | 221 | 62 | per01, ubi>UCP4c / Ctrl, ubi>UCP4c | 0.00     | ns               |                 |  |  |            |  |  |          |  |  |                  |  |  |
| per01; ubi-GAL4>UAS-Ucp4C   | 3K     | 1   | -            | 157 | 60 | per01, ubi / per01, ubi>UCP        | -3.23    | ns               |                 |  |  |            |  |  |          |  |  |                  |  |  |
| Control; ubi-GAL4>          |        | 2   | -            | 338 | 51 | Ctrl, ubi / per01, ubi             | 15.69    | <0.0001          |                 |  |  |            |  |  |          |  |  |                  |  |  |
| Control; ubi-GAL4>UAS-Ucp4C |        | 2   | -            | 547 | 60 | Ctrl, ubi / Ctrl, ubi>UCP4c        | 17.65    | <0.0001          |                 |  |  |            |  |  |          |  |  |                  |  |  |
| per01; ubi-GAL4>            |        | 2   | -            | 315 | 59 | per01, ubi>UCP4c / Ctrl, ubi>UCP4c | 0.00     | ns               |                 |  |  |            |  |  |          |  |  |                  |  |  |
| per01; ubi-GAL4>UAS-Ucp4C   |        | 2   | -            | 564 | 60 | per01, ubi / per01, ubi>UCP4C      | 1.69     | ns               |                 |  |  |            |  |  |          |  |  |                  |  |  |

| Figure 4                  |        |     | Figure         |     |    | Drug/Diet                      |          |                  | Median Lifespan |  |  | comparison |  |  | % change |  |  | log-rank p-value |  |  |
|---------------------------|--------|-----|----------------|-----|----|--------------------------------|----------|------------------|-----------------|--|--|------------|--|--|----------|--|--|------------------|--|--|
| Genotype                  | Figure | rep |                | n   |    | comparison                     | % change | log-rank p-value |                 |  |  |            |  |  |          |  |  |                  |  |  |
| Control; daGS>UAS-per24   | 4A     | 1   | etOH           | 314 | 52 | Ctrl no RU / per01 no RU       | 19.23    | <0.0001          |                 |  |  |            |  |  |          |  |  |                  |  |  |
| Control; daGS>UAS-per24   | 4A     | 1   | 100µg/ml RU486 | 323 | 52 | Ctrl no RU / Ctrl +RU          | 0.00     | ns               |                 |  |  |            |  |  |          |  |  |                  |  |  |
| per01; daGS>UAS-per24     | 4A     | 1   | etOH           | 439 | 62 | Ctrl + RU / per01 + RU         | -3.85    | <0.05            |                 |  |  |            |  |  |          |  |  |                  |  |  |
| per01; daGS>UAS-per24     | 4A     | 1   | 100µg/ml RU487 | 318 | 50 | per01 no RU / per01 +RU        | -19.35   | <0.0001          |                 |  |  |            |  |  |          |  |  |                  |  |  |
| Control; daGS>UAS-per24   |        | 2   | etOH           | 173 | 50 | Ctrl no RU / per01 no RU       | 16.00    | <0.0001          |                 |  |  |            |  |  |          |  |  |                  |  |  |
| Control; daGS>UAS-per24   |        | 2   | 100µg/ml RU488 | 192 | 50 | Ctrl no RU / Ctrl +RU          | 0.00     | ns               |                 |  |  |            |  |  |          |  |  |                  |  |  |
| per01; daGS>UAS-per24     |        | 2   | etOH           | 221 | 58 | Ctrl + RU / per01 + RU         | 0.00     | ns               |                 |  |  |            |  |  |          |  |  |                  |  |  |
| per01; daGS>UAS-per24     |        | 2   | 100µg/ml RU489 | 149 | 50 | per01 no RU / per01 +RU        | -13.79   | <0.0001          |                 |  |  |            |  |  |          |  |  |                  |  |  |
| Control; daGS>UAS-per10   |        | 1   | etOH           | 141 | 53 | Ctrl no RU / per01 no RU       | 16.98    | <0.0001          |                 |  |  |            |  |  |          |  |  |                  |  |  |
| Control; daGS>UAS-per10   |        | 1   | 100µg/ml RU490 | 151 | 54 | Ctrl no RU / Ctrl +RU          | 1.89     | <0.05            |                 |  |  |            |  |  |          |  |  |                  |  |  |
| per01; daGS>UAS-per10     |        | 1   | etOH           | 218 | 62 | Ctrl + RU / per01 + RU         | -3.70    | <0.01            |                 |  |  |            |  |  |          |  |  |                  |  |  |
| per01; daGS>UAS-per10     |        | 1   | 100µg/ml RU491 | 179 | 52 | per01 no RU / per01 +RU        | -16.13   | <0.0001          |                 |  |  |            |  |  |          |  |  |                  |  |  |
| Control; elav>UAS-per24   | 4B     | 1   | etOH           | 294 | 50 | Ctrl no RU / per01 no RU       | 14.00    | <0.0001          |                 |  |  |            |  |  |          |  |  |                  |  |  |
| Control; elav>UAS-per24   | 4B     | 1   | 100µg/ml RU486 | 272 | 50 | Ctrl no RU / Ctrl +RU          | 0.00     | ns               |                 |  |  |            |  |  |          |  |  |                  |  |  |
| per01; elav>UAS-per24     | 4B     | 1   | etOH           | 268 | 57 | Ctrl + RU / per01 + RU         | 14.00    | <0.0001          |                 |  |  |            |  |  |          |  |  |                  |  |  |
| per01; elav>UAS-per24     | 4B     | 1   | 100µg/ml RU487 | 299 | 57 | per01 no RU / per01 +RU        | 0.00     | ns               |                 |  |  |            |  |  |          |  |  |                  |  |  |
| Control; elav>UAS-per24   |        | 2   | etOH           | 287 | 50 | Ctrl no RU / per01 no RU       | 16.00    | <0.0001          |                 |  |  |            |  |  |          |  |  |                  |  |  |
| Control; elav>UAS-per24   |        | 2   | 100µg/ml RU488 | 190 | 50 | Ctrl no RU / Ctrl +RU          | 0.00     | ns               |                 |  |  |            |  |  |          |  |  |                  |  |  |
| per01; elav>UAS-per24     |        | 2   | etOH           | 406 | 58 | Ctrl + RU / per01 + RU         | 18.00    | <0.0001          |                 |  |  |            |  |  |          |  |  |                  |  |  |
| per01; elav>UAS-per24     |        | 2   | 100µg/ml RU489 | 321 | 59 | per01 no RU / per01 +RU        | 1.72     | ns               |                 |  |  |            |  |  |          |  |  |                  |  |  |
| Control; elav>UAS-per10   |        | 1   | etOH           | 413 | 52 | Ctrl no RU / per01 no RU       | 17.31    | <0.0001          |                 |  |  |            |  |  |          |  |  |                  |  |  |
| Control; elav>UAS-per10   |        | 1   | 100µg/ml RU490 | 268 | 50 | Ctrl no RU / Ctrl +RU          | -3.85    | <0.001           |                 |  |  |            |  |  |          |  |  |                  |  |  |
| per01; elav>UAS-per10     |        | 1   | etOH           | 424 | 61 | Ctrl + RU / per01 + RU         | 20.00    | <0.0001          |                 |  |  |            |  |  |          |  |  |                  |  |  |
| per01; elav>UAS-per10     |        | 1   | 100µg/ml RU491 | 299 | 60 | per01 no RU / per01 +RU        | -1.64    | <0.05            |                 |  |  |            |  |  |          |  |  |                  |  |  |
| Control; TIGS>UAS-per24   | 4C     | 1   | etOH           | 350 | 52 | Ctrl no RU / per01 no RU       | 13.46    | <0.0001          |                 |  |  |            |  |  |          |  |  |                  |  |  |
| Control; TIGS>UAS-per24   | 4C     | 1   | 100µg/ml RU486 | 373 | 52 | Ctrl no RU / Ctrl +RU          | 0.00     | ns               |                 |  |  |            |  |  |          |  |  |                  |  |  |
| per01; TIGS>UAS-per24     | 4C     | 1   | etOH           | 329 | 59 | Ctrl + RU / per01 + RU         | 0.00     | ns               |                 |  |  |            |  |  |          |  |  |                  |  |  |
| per01; TIGS>UAS-per24     | 4C     | 1   | 100µg/ml RU486 | 278 | 52 | per01 no RU / per01 +RU        | -11.86   | <0.0001          |                 |  |  |            |  |  |          |  |  |                  |  |  |
| Control; TIGS>UAS-per24   |        | 2   | etOH           | 346 | 52 | Ctrl no RU / per01 no RU       | 15.38    | <0.0001          |                 |  |  |            |  |  |          |  |  |                  |  |  |
| Control; TIGS>UAS-per24   |        | 2   | 100µg/ml RU486 | 355 | 50 | Ctrl no RU / Ctrl +RU          | -3.85    | <0.01            |                 |  |  |            |  |  |          |  |  |                  |  |  |
| per01; TIGS>UAS-per24     |        | 2   | etOH           | 319 | 60 | Ctrl + RU / per01 + RU         | 4.00     | <0.01            |                 |  |  |            |  |  |          |  |  |                  |  |  |
| per01; TIGS>UAS-per24     |        | 2   | 100µg/ml RU486 | 265 | 52 | per01 no RU / per01 +RU        | -13.33   | <0.0001          |                 |  |  |            |  |  |          |  |  |                  |  |  |
| Control; TIGS>UAS-per10   |        | 1   | etOH           | 319 | 48 | Ctrl no RU / per01 no RU       | 22.92    | <0.0001          |                 |  |  |            |  |  |          |  |  |                  |  |  |
| Control; TIGS>UAS-per10   |        | 1   | 100µg/ml RU486 | 334 | 50 | Ctrl no RU / Ctrl +RU          | 4.17     | <0.001           |                 |  |  |            |  |  |          |  |  |                  |  |  |
| per01; TIGS>UAS-per10     |        | 1   | etOH           | 294 | 59 | Ctrl + RU / per01 + RU         | 6.00     | <0.001           |                 |  |  |            |  |  |          |  |  |                  |  |  |
| per01; TIGS>UAS-per10     |        | 1   | 100µg/ml RU486 | 258 | 53 | per01 no RU / per01 +RU        | -10.17   | <0.0001          |                 |  |  |            |  |  |          |  |  |                  |  |  |
| Control, NP3084>          | 4D     | 1   | -              | 263 | 56 | Ctrl, NP / per01, NP           | 17.86    | <0.0001          |                 |  |  |            |  |  |          |  |  |                  |  |  |
| Control, NP3084>UAS-per24 | 4D     | 1   | -              | 378 | 54 | Ctrl, NP / Ctrl, NP>per        | -3.57    | <0.01            |                 |  |  |            |  |  |          |  |  |                  |  |  |
| per01, NP3084>            | 4D     | 1   | -              | 250 | 66 | ctrl, NP>per / per01, NP>per   | 0.00     | ns               |                 |  |  |            |  |  |          |  |  |                  |  |  |
| per01, NP3084>UAS-per24   | 4D     | 1   | -              | 410 | 54 | per01, NP / per01, NP>per      | -18.18   | <0.0001          |                 |  |  |            |  |  |          |  |  |                  |  |  |
| Control, NP3084>          |        | 2   | -              | 212 | 54 | Ctrl, NP / per01, NP           | 20.37    | <0.0001          |                 |  |  |            |  |  |          |  |  |                  |  |  |
| Control, NP3084>UAS-per24 |        | 2   | -              | 242 | 56 | Ctrl, NP / Ctrl, NP>per        | 3.70     | <0.01            |                 |  |  |            |  |  |          |  |  |                  |  |  |
| per01, NP3084>            |        | 2   | -              | 229 | 65 | ctrl, NP>per / per01, NP>per   | -10.71   | <0.0001          |                 |  |  |            |  |  |          |  |  |                  |  |  |
| per01, NP3084>UAS-per24   |        | 2   | -              | 197 | 50 | per01, NP / per01, NP>per      | -23.08   | <0.0001          |                 |  |  |            |  |  |          |  |  |                  |  |  |
| Control, Esg>             | 4E     | 1   | -              | 313 | 59 | Ctrl, Esg / per01, Esg         | 16.95    | <0.0001          |                 |  |  |            |  |  |          |  |  |                  |  |  |
| Control, esg>UAS-per24    | 4E     | 1   | -              | 394 | 63 | Ctrl, Esg / Ctrl, Esg>per      | 6.78     | <0.01            |                 |  |  |            |  |  |          |  |  |                  |  |  |
| per01, Esg>               | 4E     | 1   | -              | 577 | 69 | ctrl, Esg>per / per01, Esg>per | -3.17    | <0.01            |                 |  |  |            |  |  |          |  |  |                  |  |  |
| per01, esg>UAS-per24      | 4E     | 1   | -              | 260 | 61 | per01, Esg / per01, Esg>per    | -11.59   | <0.0001          |                 |  |  |            |  |  |          |  |  |                  |  |  |
| Control, Esg>             |        | 2   | -              | 142 | 64 | Ctrl, Esg / per01, Esg         | 12.50    | <0.0001          |                 |  |  |            |  |  |          |  |  |                  |  |  |
| Control, esg>UAS-per24    |        | 2   | -              | 152 | 66 | Ctrl, Esg / Ctrl, Esg>per      | 3.13     | <0.01            |                 |  |  |            |  |  |          |  |  |                  |  |  |
| per01, Esg>               |        | 2   | -              | 239 | 72 | ctrl, Esg>per / per01, Esg>per | -4.55    | <0.001           |                 |  |  |            |  |  |          |  |  |                  |  |  |
| per01, esg>UAS-per24      |        | 2   | -              | 155 | 63 | per01, Esg / per01, Esg>per    | -12.50   | <0.0001          |                 |  |  |            |  |  |          |  |  |                  |  |  |

Figure 4 continued

| Genotype                          | Figure | rep | Drug/Diet      | n   | Median Lifespan | comparison               | % change | log-rank p-value |
|-----------------------------------|--------|-----|----------------|-----|-----------------|--------------------------|----------|------------------|
| Control; 5961>UAS-per24           | 4E     | 1   | etOH           | 313 | 52              | Ctrl no RU / per01 no RU | 19.23    | <0.0001          |
| Control; 5961>UAS-per24           | 4E     | 1   | 100µg/ml RU486 | 358 | 54              | Ctrl no RU / Ctrl +RU    | 3.85     | <0.1             |
| per01; 5961>UAS-per24             | 4E     | 1   | etOH           | 532 | 62              | Ctrl + RU/ per01 + RU    | 0.00     | ns               |
| per01; 5961>UAS-per24             | 4E     | 1   | 100µg/ml RU486 | 355 | 54              | per01 no RU / per01 +RU  | -12.90   | <0.0001          |
| Control; 5961>UAS-per24           |        | 2   | etOH           | 213 | 51              | Ctrl no RU / per01 no RU | 17.65    | <0.0001          |
| Control; 5961>UAS-per24           |        | 2   | 100µg/ml RU486 | 311 | 51              | Ctrl no RU / Ctrl +RU    | 0.00     | ns               |
| per01; 5961>UAS-per24             |        | 2   | etOH           | 223 | 60              | Ctrl + RU/ per01 + RU    | 1.96     | ns               |
| per01; 5961>UAS-per24             |        | 2   | 100µg/ml RU486 | 196 | 52              | per01 no RU / per01 +RU  | -13.33   | <0.0001          |
| Ctrl, daGS>UAS-CAS9, UAS-pergRNA  | 4F     | 1   | etOH           | 187 | 50              | Ctrl no RU / per01 no RU | 18.00    | <0.0001          |
| Ctrl, daGS>UAS-CAS9, UAS-pergRNA  | 4F     | 1   | 100µg/ml RU486 | 251 | 58              | Ctrl no RU / Ctrl +RU    | 16.00    | <0.0001          |
| per01, daGS>UAS-CAS9, UAS-pergRNA | 4F     | 1   | etOH           | 324 | 59              | Ctrl + RU/ per01 + RU    | 0.00     | ns               |
| per01, daGS>UAS-CAS9, UAS-pergRNA | 4F     | 1   | 100µg/ml RU486 | 269 | 58              | per01 no RU / per01 +RU  | -1.69    | <0.1             |
| Ctrl, daGS>UAS-CAS9, UAS-pergRNA  |        | 2   | etOH           | 187 | 51              | Ctrl no RU / per01 no RU | 17.65    | <0.0001          |
| Ctrl, daGS>UAS-CAS9, UAS-pergRNA  |        | 2   | 100µg/ml RU486 | 265 | 58              | Ctrl no RU / Ctrl +RU    | 13.73    | <0.0001          |
| per01, daGS>UAS-CAS9, UAS-pergRNA |        | 2   | etOH           | 269 | 60              | Ctrl + RU/ per01 + RU    | 0.00     | ns               |
| per01, daGS>UAS-CAS9, UAS-pergRNA |        | 2   | 100µg/ml RU486 | 285 | 58              | per01 no RU / per01 +RU  | -3.33    | <0.1             |
| TIGS>UAS-CAS9, UAS-pergRNA        | 4G     | 1   | etOH           | 190 | 46              |                          |          |                  |
| TIGS>UAS-CAS9, UAS-pergRNA        | 4G     | 1   | 5µg/ml RU Dev  | 437 | 54              | no RU vs Dev + RU        | 17.39    | <0.0001          |
| TIGS>UAS-CAS9, UAS-pergRNA        | 4G     | 1   | 100µg/ml RU486 | 233 | 58              | no RU vs Adult + RU      | 26.09    | <0.0001          |
| 5961>UAS-CAS9, UAS-pergRNA        | 4H     | 1   | etOH           | 126 | 48              |                          |          |                  |
| 5961>UAS-CAS9, UAS-pergRNA        | 4H     | 1   | 5µg/ml RU Dev  | 142 | 60              | no RU vs Dev + RU        | 25.00    | <0.0001          |
| 5961>UAS-CAS9, UAS-pergRNA        | 4H     | 1   | 100µg/ml RU486 | 141 | 60              | no RU vs Adult + RU      | 25.00    | <0.0001          |

Figure 5

| Genotype                     | Figure | rep | Drug/Diet      | n   | Median Lifespan | comparison               | % change | log-rank p-value |
|------------------------------|--------|-----|----------------|-----|-----------------|--------------------------|----------|------------------|
| Control; TIGS>UAS-Ucp4C-RNAi | 5D     | 1   | etOH           | 280 | 43              | Ctrl no RU / per01 no RU | 27.91    | <0.0001          |
| Control; TIGS>UAS-Ucp4C-RNAi | 5D     | 1   | 100µg/ml RU486 | 216 | 37              | Ctrl no RU / Ctrl +RU    | -13.95   | <0.001           |
| per01; TIGS>UAS-Ucp4C-RNAi   | 5D     | 1   | etOH           | 293 | 55              | Ctrl + RU/ per01 + RU    | 0.00     | ns               |
| per01; TIGS>UAS-Ucp4C-RNAi   | 5D     | 1   | 100µg/ml RU486 | 259 | 37              | per01 no RU / per01 +RU  | -32.73   | <0.0001          |
| Control; TIGS>UAS-Ucp4C-RNAi |        | 2   | etOH           | 193 | 47              | Ctrl no RU / per01 no RU | 31.91    | <0.0001          |
| Control; TIGS>UAS-Ucp4C-RNAi |        | 2   | 100µg/ml RU486 | 112 | 40              | Ctrl no RU / Ctrl +RU    | -14.89   | <0.001           |
| per01; TIGS>UAS-Ucp4C-RNAi   |        | 2   | etOH           | 105 | 62              | Ctrl + RU/ per01 + RU    | 2.50     | ns               |
| per01; TIGS>UAS-Ucp4C-RNAi   |        | 2   | 100µg/ml RU486 | 119 | 41              | per01 no RU / per01 +RU  | -33.87   | <0.0001          |
| Control; 5961>UAS-Ucp4C-RNAi | 5E     | 1   | etOH           | 153 | 55              | Ctrl no RU / per01 no RU | 14.55    | <0.0001          |
| Control; 5961>UAS-Ucp4C-RNAi | 5E     | 1   | 100µg/ml RU486 | 117 | 53              | Ctrl no RU / Ctrl +RU    | -3.64    | <0.001           |
| per01; 5961>UAS-Ucp4C-RNAi   | 5E     | 1   | etOH           | 234 | 63              | Ctrl + RU/ per01 + RU    | 0.00     | ns               |
| per01; 5961>UAS-Ucp4C-RNAi   | 5E     | 1   | 100µg/ml RU486 | 123 | 53              | per01 no RU / per01 +RU  | -15.87   | <0.0001          |
| Control; 5961>UAS-Ucp4C-RNAi |        | 2   | etOH           | 188 | 53              | Ctrl no RU / per01 no RU | 18.87    | <0.0001          |
| Control; 5961>UAS-Ucp4C-RNAi |        | 2   | 100µg/ml RU486 | 167 | 51              | Ctrl no RU / Ctrl +RU    | -3.77    | <0.001           |
| per01; 5961>UAS-Ucp4C-RNAi   |        | 2   | etOH           | 201 | 63              | Ctrl + RU/ per01 + RU    | 0.00     | ns               |
| per01; 5961>UAS-Ucp4C-RNAi   |        | 2   | 100µg/ml RU486 | 126 | 51              | per01 no RU / per01 +RU  | -19.05   | <0.0001          |
| NP3084>+                     | 5F     | 1   | -              | 364 | 54              |                          |          |                  |
| UAS-Ucp4C>+                  | 5F     | 1   | -              | 315 | 52              | NP>+ vs. NP>UCP4c        | 14.81    | <0.0001          |
| NP3084>UAS-Ucp4C             | 5F     | 1   | -              | 287 | 62              | UAS>+ vs. NP>UCP4c       | 19.23    | <0.0001          |
| NP3084>+                     |        | 2   | -              | 256 | 56              |                          |          |                  |
| UAS-Ucp4C>+                  |        | 2   | -              | 436 | 54              | NP>+ vs. NP>UCP4c        | 10.71    | <0.0001          |
| NP3084>UAS-Ucp4C             |        | 2   | -              | 291 | 62              | UAS>+ vs. NP>UCP4c       | 14.81    | <0.0001          |
| NP3084>+                     |        | 3   | -              | 261 | 50              |                          |          |                  |
| UAS-Ucp4C>+                  |        | 3   | -              | 283 | 54              | NP>+ vs. NP>UCP4c        | 24.00    | <0.0001          |
| NP3084>UAS-Ucp4C             |        | 3   | -              | 274 | 62              | UAS>+ vs. NP>UCP4c       | 14.81    | <0.0001          |
| Esg>+                        | 5G     | 1   | -              | 107 | 57              |                          |          |                  |
| UAS-Ucp4C>+                  | 5G     | 1   | -              | 131 | 59              | Esg>+ vs. Esg>UCP4c      | 31.58    | <0.0001          |
| Esg>UAS-Ucp4C                | 5G     | 1   | -              | 174 | 75              | UAS>+ vs. Esg>UCP4c      | 27.12    | <0.0001          |
| Esg>+                        |        | 2   | -              | 122 | 58              |                          |          |                  |
| UAS-Ucp4C>+                  |        | 2   | -              | 145 | 56              | Esg>+ vs. Esg>UCP4c      | 20.69    | <0.0001          |
| Esg>UAS-Ucp4C                |        | 2   | -              | 118 | 70              | UAS>+ vs. Esg>UCP4c      | 25.00    | <0.0001          |
| 5961>UAS-Ucp4C               | 5H     | 1   | etOH           | 140 | 51              |                          |          |                  |
| 5961>UAS-Ucp4C               | 5H     | 1   | 100µg/ml RU487 | 254 | 61              | no RU vs. + RU           | 19.61    | <0.0001          |
| 5961>UAS-Ucp4C               |        | 2   | etOH           | 212 | 52              |                          |          |                  |
| 5961>UAS-Ucp4C               |        | 2   | 100µg/ml RU488 | 234 | 60              | no RU vs. + RU           | 15.38    | <0.0001          |
| 5961>UAS-Ucp4C               |        | 3   | etOH           | 115 | 50              |                          |          |                  |
| 5961>UAS-Ucp4C               |        | 3   | 100µg/ml RU489 | 101 | 59              | no RU vs. + RU           | 18.00    | <0.0001          |

Figure 7

| Genotype             | Figure | rep | Drug/Diet           | n   | Median Lifespan | comparison               | % change | log-rank p-value |
|----------------------|--------|-----|---------------------|-----|-----------------|--------------------------|----------|------------------|
| W1118 Canton S       | 7A     | 1   | EIOH                | 243 | 51              |                          |          |                  |
| W1118 Canton S       | 7A     | 1   | 50µM DNP (all life) | 261 | 60              | Vehicle vs. DNP all life | 17.65    | <0.0001          |
| W1118 Canton S       | 7B     | 1   | EIOH                | 201 | 51              |                          |          |                  |
| W1118 Canton S       | 7B     | 1   | 50µM DNP Adult      | 199 | 61              | Vehicle vs. DNP Adult    | 19.61    | <0.0001          |
| W1118 Canton S       |        | 2   | EIOH                | 124 | 50              |                          |          |                  |
| W1118 Canton S       |        | 2   | 50µM DNP Adult      | 119 | 58              | Vehicle vs. DNP Adult    | 16.00    | <0.0001          |
| W1118 Canton S       | 7C/S6C | -   | EIOH                | 201 | 51              | etOH Vs.                 |          |                  |
| W1118 Canton S       | 7C/S6C | -   | 10µM DNP Adult      | 207 | 56              | 10µM DNP Adult           | 9.80     | <0.0001          |
| W1118 Canton S       | 7C/S6C | -   | 50µM DNP Adult      | 199 | 61              | 50µM DNP Adult           | 19.61    | <0.0001          |
| W1118 Canton S       | 7C/S6C | -   | 100µM DNP Adult     | 198 | 49              | 100µM DNP Adult          | -3.92    | <0.1             |
| esgts>UAS-Notch-RNAi | 7H     | 1   | EIOH                | 116 | 25              |                          |          |                  |
| esgts>UAS-Notch-RNAi | 7H     | 1   | 50µM DNP Adult      | 88  | 44              | Vehicle vs. DNP Adult    | 76.00    | <0.0001          |
| esgts>UAS-Notch-RNAi |        | 2   | EIOH                | 84  | 32              |                          |          |                  |
| esgts>UAS-Notch-RNAi |        | 2   | 50µM DNP Adult      | 71  | 45              | Vehicle vs. DNP Adult    | 40.63    | <0.0001          |

| Supplementary Figure 1      |        |     |                |     | Median   |                                  |          | log-rank |
|-----------------------------|--------|-----|----------------|-----|----------|----------------------------------|----------|----------|
| Genotype                    | Figure | rep | Drug/Diet      | n   | Lifespan | comparison                       | % change | p-value  |
| Control; ubi-GAL4>          |        | 1   | -              | 196 | 54       | Ctrl ubi / per01 ubi             | 14.81    | <0.0001  |
| Control; ubi-GAL4>UAS-per24 |        | 1   | -              | 190 | 52       | Ctrl ubi / Ctrl ubi>per          | -3.70    | <0.01    |
| per01; ubi-GAL4>            |        | 1   | -              | 221 | 62       | Ctrl ubi>per / per01 ubi>per     | 1.92     | ns       |
| per01; ubi-GAL4>UAS-per24   |        | 1   | -              | 173 | 53       | per01 ubi / per01 ubi>per        | -14.52   | <0.0001  |
| Control; ubi-GAL4>          | S1A    | 2   | -              | 430 | 50       | Ctrl ubi / per01 ubi             | 20.00    | <0.0001  |
| Control; ubi-GAL4>UAS-per24 | S1A    | 2   | -              | 181 | 52       | Ctrl ubi / Ctrl ubi>per          | 4.00     | ns       |
| per01; ubi-GAL4>            | S1A    | 2   | -              | 535 | 60       | Ctrl ubi>per / per01 ubi>per     | -3.85    | ns       |
| per01; ubi-GAL4>UAS-per24   | S1A    | 2   | -              | 182 | 50       | per01 ubi / per01 ubi>per        | -16.67   | <0.0001  |
| Control; ubi-GAL4>          |        | 1   | -              | 170 | 52       | Ctrl ubi / per01 ubi             | 21.15    | <0.0001  |
| Control; ubi-GAL4>UAS-per10 |        | 1   | -              | 203 | 52       | Ctrl ubi / Ctrl ubi>per          | 0.00     | ns       |
| per01; ubi-GAL4>            |        | 1   | -              | 227 | 63       | Ctrl ubi>per / per01 ubi>per     | 3.85     | 0.04398  |
| per01; ubi-GAL4>UAS-per10   |        | 1   | -              | 170 | 54       | per01 ubi / per01 ubi>per        | -14.29   | <0.0001  |
| Control; ubi-GAL4>          | S1A    | 2   | -              | 209 | 52       | Ctrl ubi / per01 ubi             | 17.31    | <0.0001  |
| Control; ubi-GAL4>UAS-per10 | S1A    | 2   | -              | 222 | 52       | Ctrl ubi / Ctrl ubi>per          | 0.00     | ns       |
| per01; ubi-GAL4>            | S1A    | 2   | -              | 159 | 61       | Ctrl ubi>per / per01 ubi>per     | 1.92     | ns       |
| per01; ubi-GAL4>UAS-per10   | S1A    | 2   | -              | 329 | 53       | per01 ubi / per01 ubi>per        | -13.11   | <0.0001  |
| Control; tim-GAL4>          | S1B    | 1   | -              | 158 | 50       | Ctrl Tim / per01 Tim             | 24.00    | <0.0001  |
| Control; tim>UAS-per10      | S1B    | 1   | -              | 129 | 52       | Ctrl Tim / Ctrl Tim>per10        | 4.00     | ns       |
| Control; tim>UAS-per24      | S1B    | 1   | -              | 103 | 46       | Ctrl Tim / Ctrl Tim>per24        | -7.69    | <0.01    |
| per01; tim-GAL4>            | S1B    | 1   | -              | 237 | 62       | per01 Tim ctrl / per01 Tim>per10 | -25.81   | <0.0001  |
| per01; tim-GAL4>UAS-per10   | S1B    | 1   | -              | 130 | 46       | per01 Tim ctrl / per01 Tim>per24 | -25.81   | <0.0001  |
| per01; tim-GAL4>UAS-per24   | S1B    | 1   | -              | 144 | 46       | Ctrl Tim>per24 / per01 TIM>per24 | 0.00     | ns       |
| Control; daGS>              |        | 1   | etOH           | 275 | 54       | Ctrl no RU / per01 no RU         | 18.52    | <0.0001  |
| Control; daGS>              |        | 1   | 100µg/ml RU486 | 254 | 52       | Ctrl no RU / +RU                 | -3.70    | 0.02983  |
| per01; daGS>                |        | 2   | etOH           | 291 | 64       | Ctrl +RU / per01 +RU             | 23.08    | <0.0001  |
| per01; daGS>                |        | 2   | 100µg/ml RU486 | 311 | 64       | per01 no RU / per01 +RU          | 0.00     | ns       |
| Control; daGS>              | S1D    | 1   | etOH           | 193 | 53       | Ctrl no RU / per01 no RU         | 20.75    | <0.0001  |
| Control; daGS>              | S1D    | 1   | 100µg/ml RU486 | 201 | 52       | no RU / +RU                      | -1.89    | ns       |
| per01; daGS>                | S1D    | 2   | etOH           | 176 | 64       | Ctrl +RU / per01 +RU             | 19.23    | <0.0001  |
| per01; daGS>                | S1D    | 2   | 100µg/ml RU486 | 182 | 62       | per01 no RU / per01 +RU          | -3.13    | ns       |

| Supplementary Figure 3       |        |     |                |     | Median   |                          |          | log-rank |
|------------------------------|--------|-----|----------------|-----|----------|--------------------------|----------|----------|
| Genotype                     | Figure | rep | Drug/Diet      | n   | Lifespan | comparison               | % change | p-value  |
| Control; daGS>UAS-Ucp4A-RNAi | S3E    | 1   | etOH           | 238 | 51       | Ctrl no RU / per01 no RU | 19.61    | <0.0001  |
| Control; daGS>UAS-Ucp4A-RNAi | S3E    | 1   | 100µg/ml RU486 | 415 | 51       | Ctrl no RU / +RU         | 0.00     | ns       |
| per01; daGS>UAS-Ucp4A-RNAi   | S3E    | 1   | etOH           | 320 | 61       | Ctrl +RU / per01 +RU     | 15.69    | <0.0001  |
| per01; daGS>UAS-Ucp4A-RNAi   | S3E    | 1   | 100µg/ml RU486 | 370 | 59       | per01 no RU / per01 +RU  | -3.28    | <0.01    |
| Control; daGS>UAS-Ucp4A-RNAi |        | 2   | etOH           | 192 | 50       | Ctrl no RU / per01 no RU | 18.00    | <0.0001  |
| Control; daGS>UAS-Ucp4A-RNAi |        | 2   | 100µg/ml RU486 | 189 | 49       | no RU / +RU              | -2.00    | ns       |
| per01; daGS>UAS-Ucp4A-RNAi   |        | 2   | etOH           | 246 | 59       | Ctrl +RU / per01 +RU     | 20.41    | <0.0001  |
| per01; daGS>UAS-Ucp4A-RNAi   |        | 2   | 100µg/ml RU486 | 221 | 59       | per01 no RU / per01 +RU  | 0.00     | ns       |
| Control; daGS>UAS-Ucp4B-RNAi | S3F    | 1   | etOH           | 294 | 55       | Ctrl no RU / per01 no RU | 18.18    | <0.0001  |
| Control; daGS>UAS-Ucp4B-RNAi | S3F    | 1   | 100µg/ml RU486 | 258 | 51       | Ctrl no RU / +RU         | -7.27    | <0.0001  |
| per01; daGS>UAS-Ucp4B-RNAi   | S3F    | 1   | etOH           | 231 | 65       | Ctrl +RU / per01 +RU     | -3.92    | ns       |
| per01; daGS>UAS-Ucp4B-RNAi   | S3F    | 1   | 100µg/ml RU486 | 264 | 49       | per01 no RU / per01 +RU  | -24.62   | <0.0001  |
| Control; daGS>UAS-Ucp4B-RNAi |        | 2   | etOH           | 119 | 52       | Ctrl no RU / per01 no RU | 21.15    | <0.0001  |
| Control; daGS>UAS-Ucp4B-RNAi |        | 2   | 100µg/ml RU486 | 213 | 50       | no RU / +RU              | -3.85    | <0.0001  |
| per01; daGS>UAS-Ucp4B-RNAi   |        | 2   | etOH           | 175 | 63       | Ctrl +RU / per01 +RU     | 0.00     | ns       |
| per01; daGS>UAS-Ucp4B-RNAi   |        | 2   | 100µg/ml RU486 | 154 | 50       | per01 no RU / per01 +RU  | -20.63   | <0.0001  |
| Control; daGS>UAS-Ucp4C-RNAi | S3G    | 1   | etOH           | 262 | 57       | Ctrl no RU / per01 no RU | 14.04    | <0.0001  |
| Control; daGS>UAS-Ucp4C-RNAi | S3G    | 1   | 100µg/ml RU486 | 349 | 55       | Ctrl no RU / +RU         | -3.51    | <0.01    |
| per01; daGS>UAS-Ucp4C-RNAi   | S3G    | 1   | etOH           | 479 | 65       | Ctrl +RU / per01 +RU     | -3.64    | <0.0001  |
| per01; daGS>UAS-Ucp4C-RNAi   | S3G    | 1   | 100µg/ml RU486 | 423 | 53       | per01 no RU / per01 +RU  | -18.46   | <0.0001  |
| Control; daGS>UAS-Ucp4C-RNAi |        | 2   | etOH           | 212 | 55       | Ctrl no RU / per01 no RU | 20.00    | <0.0001  |
| Control; daGS>UAS-Ucp4C-RNAi |        | 2   | 100µg/ml RU486 | 199 | 54       | no RU / +RU              | -1.82    | <0.01    |
| per01; daGS>UAS-Ucp4C-RNAi   |        | 2   | etOH           | 189 | 66       | Ctrl +RU / per01 +RU     | 0.00     | ns       |
| per01; daGS>UAS-Ucp4C-RNAi   |        | 2   | 100µg/ml RU486 | 193 | 54       | per01 no RU / per01 +RU  | -18.18   | <0.0001  |

| Supplementary Figure 4 |        |     |              |     | Median   |             |          | log-rank |
|------------------------|--------|-----|--------------|-----|----------|-------------|----------|----------|
| Genotype               | Figure | rep | Drug/Diet    | n   | Lifespan | comparison  | % change | p-value  |
| daGS>+                 | S4C    | 1   | etOH         | 279 | 54       |             |          |          |
| daGS>+                 | S4C    | 1   | 5µg/ml RU486 | 232 | 52       | no RU / +RU | -3.70    | <0.05    |
| daGS>+                 |        | 2   | etOH         | 211 | 51       |             |          |          |
| daGS>+                 |        | 2   | 5µg/ml RU486 | 214 | 51       | no RU / +RU | 0.00     | ns       |

Supplementary Figure 5

| Genotype                              | Figure | rep | Drug/Diet      | n   | Median Lifespan | comparison               | % change | log-rank p-value |
|---------------------------------------|--------|-----|----------------|-----|-----------------|--------------------------|----------|------------------|
| <i>daGS&gt;UAS-CAS9, UAS-CtrigRNA</i> | S5D    | -   | etOH           | 217 | 48              |                          |          |                  |
| <i>daGS&gt;UAS-CAS9, UAS-CtrigRNA</i> | S5D    | -   | 5µg/ml RU Dev  | 194 | 40              | no RU vs Dev + RU        | -16.67   | <0.0001          |
| <i>daGS&gt;UAS-CAS9, UAS-CtrigRNA</i> | S5D    | -   | 100µg/ml RU486 | 134 | 46              | no RU vs Adult + RU      | -4.17    | <0.01            |
| <i>TIGS&gt;UAS-CAS9, UAS-CtrigRNA</i> | S5E    | -   | etOH           | 157 | 46              |                          |          |                  |
| <i>TIGS&gt;UAS-CAS9, UAS-CtrigRNA</i> | S5E    | -   | 5µg/ml RU Dev  | 140 | 48              | no RU vs Dev + RU        | 4.35     | <0.01            |
| <i>TIGS&gt;UAS-CAS9, UAS-CtrigRNA</i> | S5E    | -   | 100µg/ml RU486 | 114 | 45              | no RU vs Adult + RU      | -2.17    | ns               |
| <i>5961&gt;UAS-CAS9, UAS-CtrigRNA</i> | S5F    | -   | etOH           | 163 | 46              |                          |          |                  |
| <i>5961&gt;UAS-CAS9, UAS-CtrigRNA</i> | S5F    | -   | 5µg/ml RU Dev  | 168 | 43              | no RU vs Dev + RU        | -6.52    | <0.0001          |
| <i>5961&gt;UAS-CAS9, UAS-CtrigRNA</i> | S5F    | -   | 100µg/ml RU486 | 104 | 42              | no RU vs Adult + RU      | -8.70    | <0.0001          |
| <i>Control; elav&gt;</i>              | S5G    | 1   | etOH           | 534 | 50              | Ctrl no RU / per01 no RU | 12.00    | <0.0001          |
| <i>Control; elav&gt;</i>              | S5G    | 1   | 100µg/ml RU486 | 500 | 50              | Ctrl no RU / Ctrl +RU    | 0.00     | ns               |
| <i>per01; elav&gt;</i>                | S5G    | 1   | etOH           | 788 | 56              | Ctrl + RU/ per01 + RU    | 14.00    | <0.0001          |
| <i>per01; elav&gt;</i>                | S5G    | 1   | 100µg/ml RU487 | 663 | 57              | per01 no RU / per01 +RU  | 1.79     | <0.01            |
| <i>Control; elav&gt;</i>              |        | 2   | etOH           | 554 | 46              | Ctrl no RU / per01 no RU | 21.74    | <0.0001          |
| <i>Control; elav&gt;</i>              |        | 2   | 100µg/ml RU488 | 500 | 47              | Ctrl no RU / Ctrl +RU    | 2.17     | <0.01            |
| <i>per01; elav&gt;</i>                |        | 2   | etOH           | 610 | 56              | Ctrl + RU/ per01 + RU    | 21.28    | <0.0001          |
| <i>per01; elav&gt;</i>                |        | 2   | 100µg/ml RU489 | 663 | 57              | per01 no RU / per01 +RU  | 1.79     | ns               |
| <i>Control; TIGS&gt;</i>              | S5H    | 1   | etOH           | 504 | 48              | Ctrl no RU / per01 no RU | 14.58    | <0.0001          |
| <i>Control; TIGS&gt;</i>              | S5H    | 1   | 100µg/ml RU486 | 554 | 46              | Ctrl no RU / Ctrl +RU    | -4.17    | ns               |
| <i>per01; TIGS&gt;</i>                | S5H    | 1   | etOH           | 746 | 55              | Ctrl + RU/ per01 + RU    | 19.57    | <0.0001          |
| <i>per01; TIGS&gt;</i>                | S5H    | 1   | 100µg/ml RU487 | 610 | 55              | per01 no RU / per01 +RU  | 0.00     | ns               |
| <i>Control; TIGS&gt;</i>              |        | 2   | etOH           | 354 | 49              | Ctrl no RU / per01 no RU | 18.37    | <0.0001          |
| <i>Control; TIGS&gt;</i>              |        | 2   | 100µg/ml RU488 | 312 | 51              | Ctrl no RU / Ctrl +RU    | 4.08     | <0.001           |
| <i>per01; TIGS&gt;</i>                |        | 2   | etOH           | 310 | 58              | Ctrl + RU/ per01 + RU    | 11.76    | <0.0001          |
| <i>per01; TIGS&gt;</i>                |        | 2   | 100µg/ml RU489 | 333 | 57              | per01 no RU / per01 +RU  | -1.72    | ns               |
| <i>Control; 5961&gt;</i>              | S5I    | 1   | etOH           | 136 | 56              | Ctrl no RU / per01 no RU | 10.71    | <0.0001          |
| <i>Control; 5961&gt;</i>              | S5I    | 1   | 100µg/ml RU486 | 126 | 56              | Ctrl no RU / Ctrl +RU    | 0.00     | ns               |
| <i>per01; 5961&gt;</i>                | S5I    | 1   | etOH           | 149 | 62              | Ctrl + RU/ per01 + RU    | 10.71    | <0.0001          |
| <i>per01; 5961&gt;</i>                | S5I    | 1   | 100µg/ml RU487 | 202 | 62              | per01 no RU / per01 +RU  | 0.00     | ns               |
| <i>Control; 5961&gt;</i>              |        | 2   | etOH           | 184 | 55              | Ctrl no RU / per01 no RU | 14.55    | <0.0001          |
| <i>Control; 5961&gt;</i>              |        | 2   | 100µg/ml RU488 | 155 | 54              | Ctrl no RU / Ctrl +RU    | -1.82    | ns               |
| <i>per01; 5961&gt;</i>                |        | 2   | etOH           | 127 | 63              | Ctrl + RU/ per01 + RU    | 14.81    | <0.0001          |
| <i>per01; 5961&gt;</i>                |        | 2   | 100µg/ml RU489 | 146 | 62              | per01 no RU / per01 +RU  | -1.59    | <0.05            |

Supplementary Figure 6

| Genotype                    | Figure | rep | Drug/Diet      | n   | Median Lifespan | comparison     | % change | log-rank p-value |
|-----------------------------|--------|-----|----------------|-----|-----------------|----------------|----------|------------------|
| <i>elav-GS&gt;UAS-Ucp4C</i> | S6C    | 1   | etOH           | 203 | 49              |                |          |                  |
| <i>elav-GS&gt;UAS-Ucp4C</i> | S6C    | 1   | 100µg/ml RU487 | 194 | 51              | no RU vs. + RU | 4.08     | ns               |
| <i>elav-GS&gt;UAS-Ucp4C</i> |        | 2   | etOH           | 147 | 51              |                |          |                  |
| <i>elav-GS&gt;UAS-Ucp4C</i> |        | 2   | 100µg/ml RU487 | 215 | 49              | no RU vs. + RU | -3.92    | ns               |
| <i>TIGS&gt;UAS-Ucp4C</i>    | S6D    | 1   | etOH           | 274 | 47              |                |          |                  |
| <i>TIGS&gt;UAS-Ucp4C</i>    | S6D    | 1   | 100µg/ml RU488 | 267 | 53              | no RU vs. + RU | 12.77    | <0.0001          |
| <i>TIGS&gt;UAS-Ucp4C</i>    |        | 2   | etOH           | 238 | 49              |                |          |                  |
| <i>TIGS&gt;UAS-Ucp4C</i>    |        | 2   | 100µg/ml RU489 | 261 | 55              | no RU vs. + RU | 12.24    | <0.0001          |

Supplementary Figure 7

| Genotype                 | Figure | rep | Drug/Diet           | n   | Median Lifespan | comparison   | % change | log-rank p-value |
|--------------------------|--------|-----|---------------------|-----|-----------------|--------------|----------|------------------|
| <i>w1118,CS control</i>  |        | 1   | 3% YE + Vehicle     | 375 | 54              |              |          |                  |
| <i>per01,w1118;CS;CS</i> |        | 1   | 3% YE + Vehicle     | 329 | 62              | ctrl / per01 | 14.81    | <0.0001          |
| <i>w1118,CS control</i>  | S7C    | 1   | 3% YE + Antibiotics | 174 | 52              |              |          |                  |
| <i>per01,w1118;CS;CS</i> | S7C    | 1   | 3% YE + Antibiotics | 202 | 62              | ctrl / per01 | 15.89    | <0.0001          |
| <i>w1118,CS control</i>  |        | 2   | 3% YE + Antibiotics | 338 | 57              |              |          |                  |
| <i>per01,w1118;CS;CS</i> |        | 2   | 3% YE + Antibiotics | 396 | 66              | ctrl / per01 | 15.79    | <0.0001          |

Supplementary Figure 8

| Genotype                     | Figure | rep | Drug/Diet         | n   | Median Lifespan | comparison       | % change | log-rank p-value |
|------------------------------|--------|-----|-------------------|-----|-----------------|------------------|----------|------------------|
| <i>W1118 Canton S</i>        | S8A/D  | -   | EtOH              | 211 | 52              | etOH Vs.         |          |                  |
| <i>W1118 Canton S</i>        | S8A/D  | -   | 0.1 mM BHT Adult  | 158 | 58              | 0.1mM BHT Adult  | 11.54    | <0.0001          |
| <i>W1118 Canton S</i>        | S8D    | -   | 0.25 mM BHT Adult | 178 | 54              | 0.25mM BHT Adult | 3.85     | <0.01            |
| <i>W1118 Canton S</i>        | S6D    | -   | 1 mM BHT Adult    | 232 | 41              | 1mM BHT Adult    | -21.15   | <0.0001          |
| <i>per01; W1118 Canton S</i> | S8D    | -   | EtOH              | 339 | 66              | etOH Vs.         |          |                  |
| <i>per01; W1118 Canton S</i> | S8D    | -   | 0.1 mM BHT Adult  | 228 | 63              | 0.1mM BHT Adult  | -4.55    | <0.0001          |
| <i>per01; W1118 Canton S</i> | S8D    | -   | 0.25 mM BHT Adult | 211 | 58              | 0.25mM BHT Adult | -12.12   | <0.0001          |
| <i>per01; W1118 Canton S</i> | S8D    | -   | 1 mM BHT Adult    | 268 | 54              | 1mM BHT Adult    | -18.18   | <0.01            |
| <i>W1118 Canton S</i>        | S8C/7C | -   | EtOH              | 201 | 51              | etOH Vs.         |          |                  |
| <i>W1118 Canton S</i>        | S8C/7C | -   | 0.01 mM DNP Adult | 207 | 58              | 10µM DNP Adult   | 13.73    | <0.0001          |
| <i>W1118 Canton S</i>        | S8C/7C | -   | 0.05 mM DNP Adult | 199 | 61              | 50µM DNP Adult   | 19.61    | <0.0001          |
| <i>W1118 Canton S</i>        | S8C/7C | -   | 0.1 mM DNP Adult  | 198 | 49              | 100µM DNP Adult  | -3.92    | <0.01            |
| <i>per01; W1118 Canton S</i> | S8C    | -   | EtOH              | 267 | 63              | etOH Vs.         |          |                  |
| <i>per01; W1118 Canton S</i> | S8C    | -   | 0.01 mM DNP Adult | 151 | 58              | 10µM DNP Adult   | -7.94    | <0.01            |
| <i>per01; W1118 Canton S</i> | S8C    | -   | 0.05 mM DNP Adult | 206 | 58              | 50µM DNP Adult   | -7.94    | <0.001           |
| <i>per01; W1118 Canton S</i> | S8C    | -   | 0.1 mM DNP Adult  | 157 | 56              | 100µM DNP Adult  | -11.11   | <0.0001          |
